# Supplementary material for: Significant contribution of organics to aerosol liquid water content in winter in Beijing, China
Source: Copernicus journal article supplement (doi:10.5194/acp-20-901-2020), 2020-01-23
Supplement: Supplementary file 1 [file acp-20-901-2020-supplement.pdf]

Supplement of Atmos. Chem. Phys., 20, 901–914, 2020  
<https://doi.org/10.5194/acp-20-901-2020-supplement>  
© Author(s) 2020. This work is distributed under  
the Creative Commons Attribution 4.0 License.

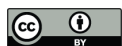

*Supplement of*

## **Significant contribution of organics to aerosol liquid water content in winter in Beijing, China**

**Xiaoai Jin et al.**

*Correspondence to:* Zhanqing Li (zli@atmos.umd.edu) and Yuying Wang (yuyingwang@nuist.edu.cn)

The copyright of individual parts of the supplement might differ from the CC BY 4.0 License.

Here we repeat ALWC simulation using ISORROPIA II model assuming the chemical species in metastable state. As shown in Fig. S1a, the simulated ALWC in metastable state ( $ALWC_{ISO\text{metastable}}$ ) is similar with that in stable state ( $R^2 = 0.99$ ). Figure S1b further compares the simulated ALWC in metastable state and calculated ALWC, showing  $ALWC_{ISO\text{metastable}}$  is still lower than  $ALWC_{HTDMA}$ .

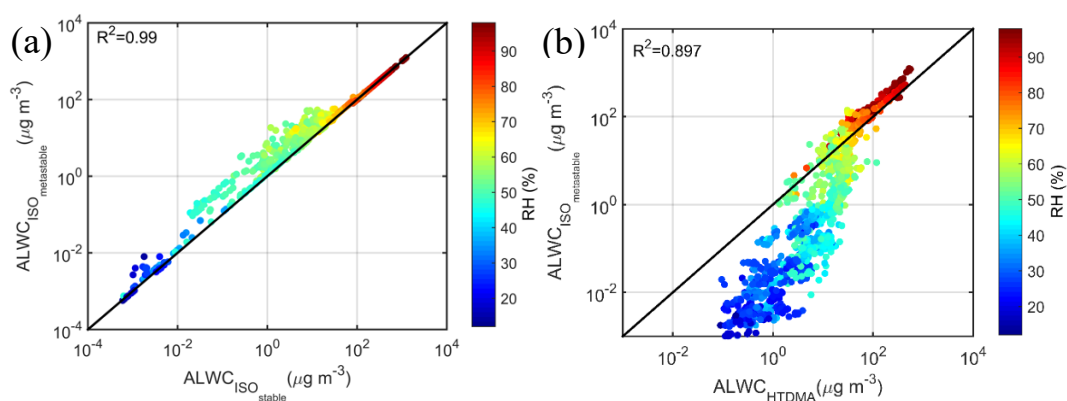

**Figure S1.** The correlation analysis between (a)  $ALWC_{ISO\text{stable}}$  and  $ALWC_{ISO\text{metastable}}$  and (b)  $ALWC_{HTDMA}$  and  $ALWC_{ISO\text{metastable}}$ .  $ALWC_{HTDMA}$  refers to calculated ALWC based on the measured growth factor and PNSDs,  $ALWC_{ISO\text{stable}}$  refers to simulated ALWC from the ISORROPIA II model assuming chemical species in the stable state.  $ALWC_{ISO\text{metastable}}$  refers to simulated ALWC from the ISORROPIA II model assuming chemical species in the metastable state. The coefficient of determination  $R^2$  is given in each panel. The color of the dots denotes the ambient RH; the black solid line denotes the 1:1 line.
